# Supplementary material
Source: publisher figshare collection journal article supplement (https://gsajournals.figshare.com/articles/dataset/_/13589606)

**Figure S1.** Pedigree structure of the five full-sib families used in mating design. Full-sib families were derived from eight parents. One parent indicated as dot was unknown. Red and blue arrows indicate female and male parents, respectively.

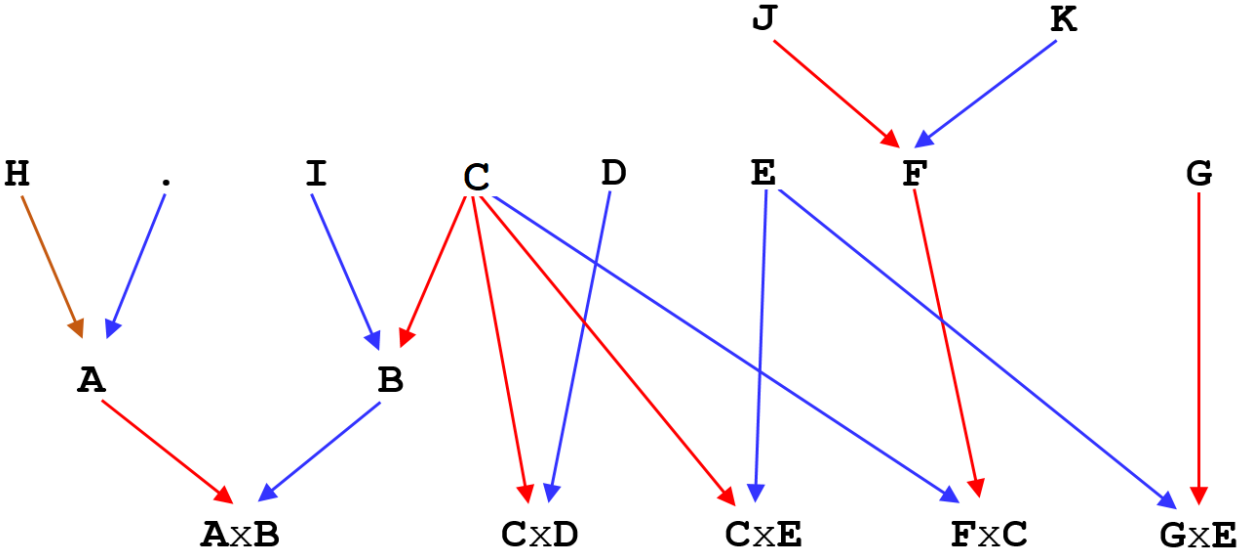

Supplement: Supplementary file 2 [file 1]
