# Supplementary material
Source: publisher figshare collection journal article supplement (https://gsajournals.figshare.com/articles/dataset/_/13589606)

**Figure S2.** Heatmap showing LD ( $r^2$ ) among the top nine SNPs detected by Bayesian whole-genome regression analysis. The three SNP loci with large effects were weakly linked with each other.

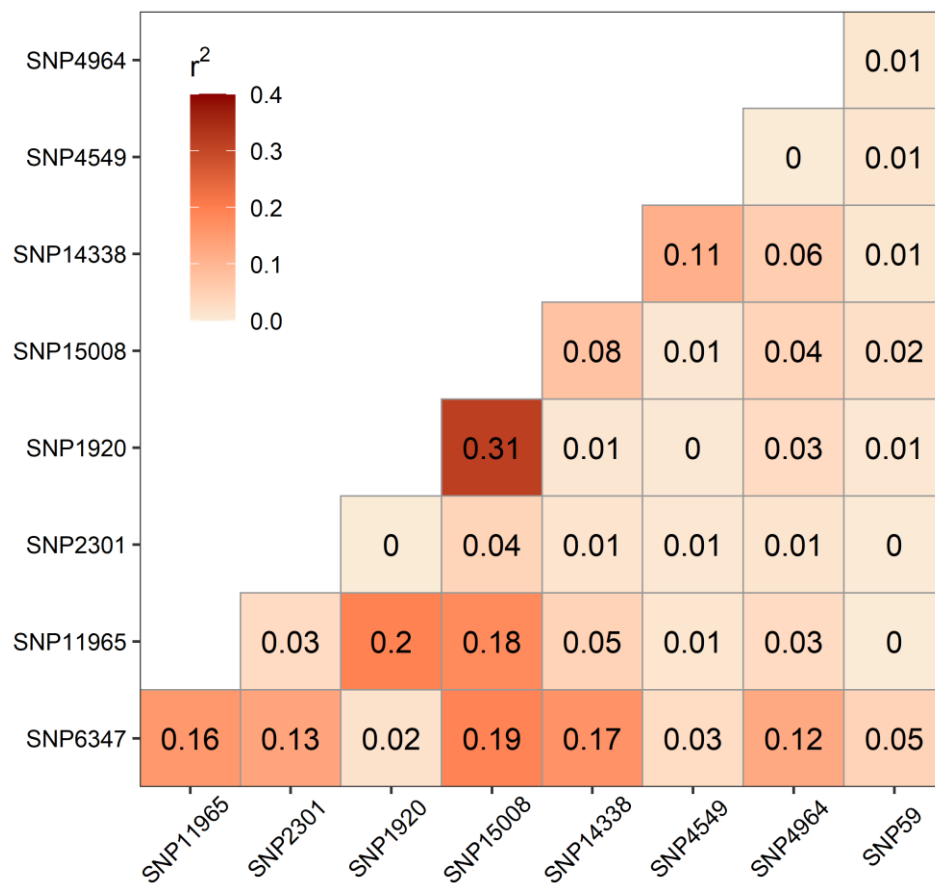

Supplement: Supplementary file 3 [file 1]
