# Supplementary material
Source: publisher figshare collection journal article supplement (https://gsajournals.figshare.com/articles/dataset/_/13589606)

**Figure S4.** Mean fusiform rust disease incidence (%) with standard errors in four haplotypes of the three SNP loci. The frequency (number of clonal varieties) of the haplotypes is provided at the top of the bars. The dosage of A allele decreased the incidence of fusiform rust disease substantially across haplotypes (P-value <0.0001).

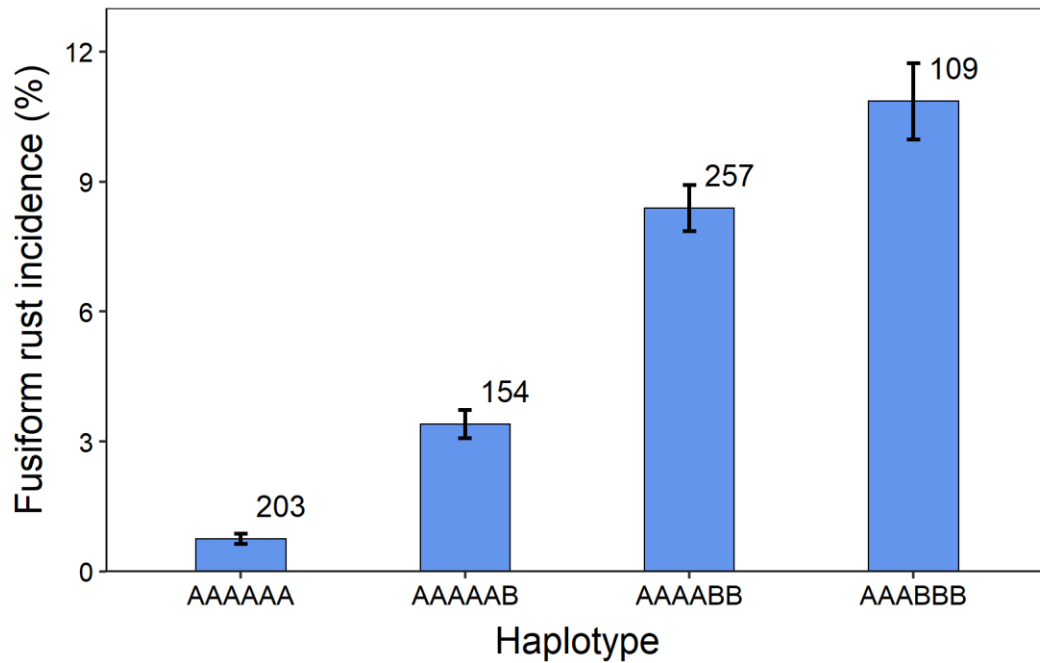

Supplement: Supplementary file 4 [file 1]
