# Supplementary material
Source: publisher figshare collection journal article supplement (https://gsajournals.figshare.com/articles/dataset/_/13589606)
Supplement: Supplementary file 5 [file 1]

**Table S2.** Observed counts of clonal varieties for three genotypic classes in three major SNP loci within the five full-sib families. Homozygous BB genotypes did not segregate in families for two loci.

| <i>Family</i> | SNP6347 |     |    | SNP11965 |     |    | SNP1920 |     |    |
|---------------|---------|-----|----|----------|-----|----|---------|-----|----|
|               | AA      | AB  | BB | AA       | AB  | BB | AA      | AB  | BB |
| <b>AxB</b>    | 0       | 46  | 0  | 46       | 0   | 0  | 16      | 25  | 5  |
| <b>CxD</b>    | 76      | 51  | 0  | 127      | 0   | 0  | 37      | 68  | 22 |
| <b>CxE</b>    | 224     | 0   | 0  | 124      | 100 | 0  | 66      | 95  | 63 |
| <b>FxC</b>    | 0       | 106 | 0  | 106      | 0   | 0  | 25      | 49  | 32 |
| <b>GxE</b>    | 220     | 0   | 0  | 114      | 106 | 0  | 115     | 105 | 0  |
