# Supplementary material
Source: publisher figshare collection journal article supplement (https://gsajournals.figshare.com/articles/dataset/_/13589606)

**Figure S3.** Residual variance trace plots of fusiform rust disease for Bayes B, Bayes  $C\pi$ , and Bayesian ridge regression. The vertical dashed line is the number of burn-in, the horizontal dashed line is the average residual variance.

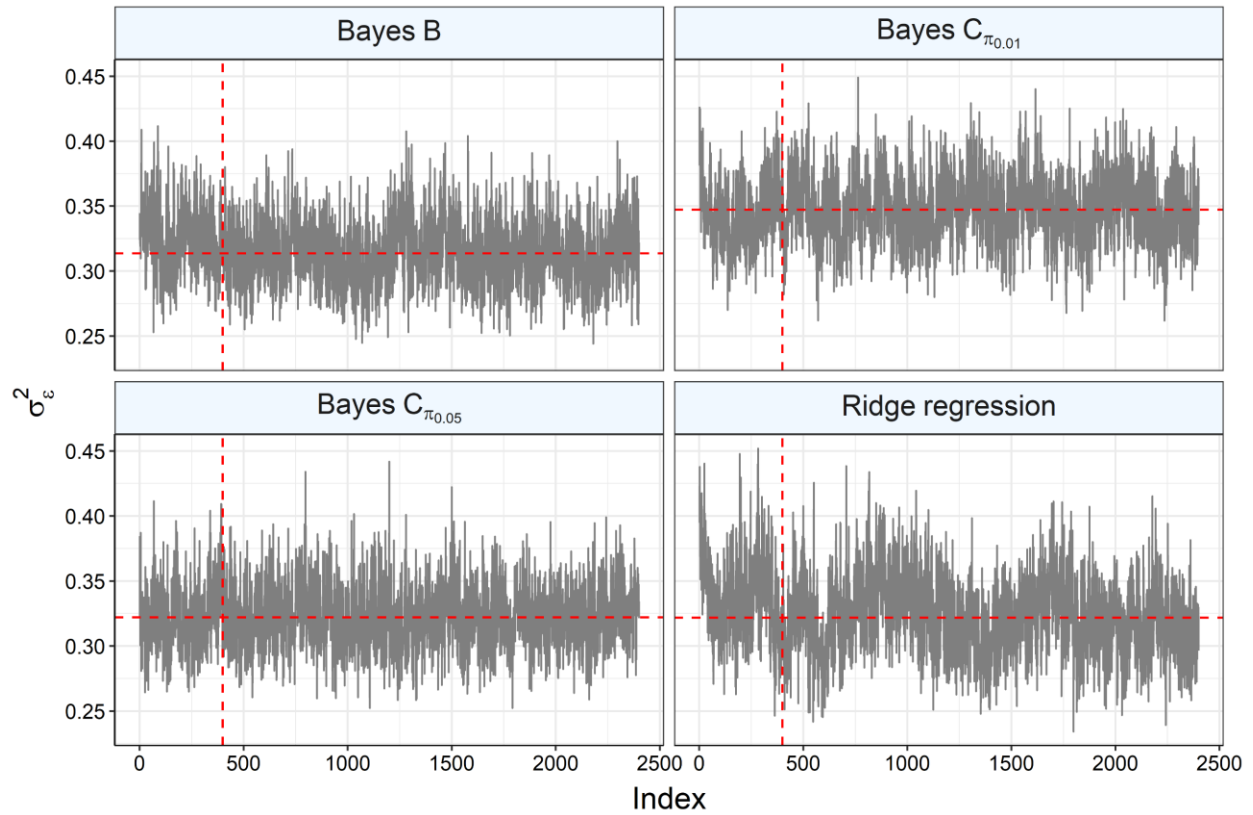

Supplement: Supplementary file 6 [file 1]
